# Supplementary material
Source: MDPI journal article supplement (https://www.mdpi.com/2073-4352/13/2/176)
Supplement: s1 [file s1]

# **The cobalt(II) oxidotellurate(IV) hydroxides $\text{Co}(\text{TeO}_3)(\text{OH})_2$ and $\text{Co}_{15}(\text{TeO}_3)_{14}(\text{OH})_2$**

## **Authors**

Felix Eder, <sup>a</sup> ORCID 0000-0002-5336-4735

Matthias Weil, <sup>a</sup> ORCID 0000-0001-5235-9910

Prativa Pramanik, <sup>b</sup> ORCID 0000-0002-2026-149X

Roland Mathieu, <sup>b</sup> ORCID 0000-0002-5261-2047

a) Institute for Chemical Technologies and Analytics, Division of Structural Chemistry, TU Wien, Getreidemarkt 9/164-5-01, 1060 Vienna / Austria

b) Department of Materials Science and Engineering, Uppsala University, Box 35, 751 03 Uppsala, Sweden

## **Supplementary material**

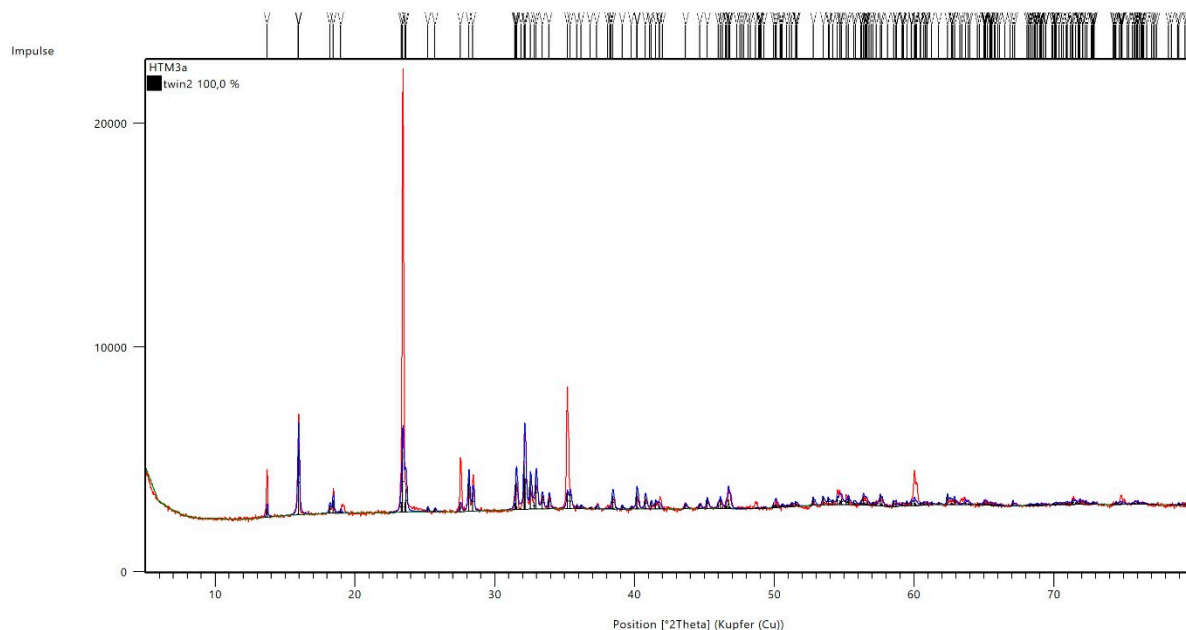

**Supplementary Figure S1.**  $\text{Co}_2(\text{TeO}_3)(\text{OH})_2$ : measured PXRD data (blue) and simulated PXRD data (red). The difference in measured and simulated intensities is a consequence of the layered character of the crystal structure, with strong texture effects of the (00k) and (01l) reflections. Refined unit-cell parameters on basis of the PXRD measurement are:  $a = 5.9167(3)$ ,  $b = 5.9540(2)$ ,  $c = 6.8108(3)$  Å,  $\alpha = 101.4890(8)$ ,  $\beta = 100.0592(8)$ ,  $\gamma = 104.2835(8)^\circ$ .

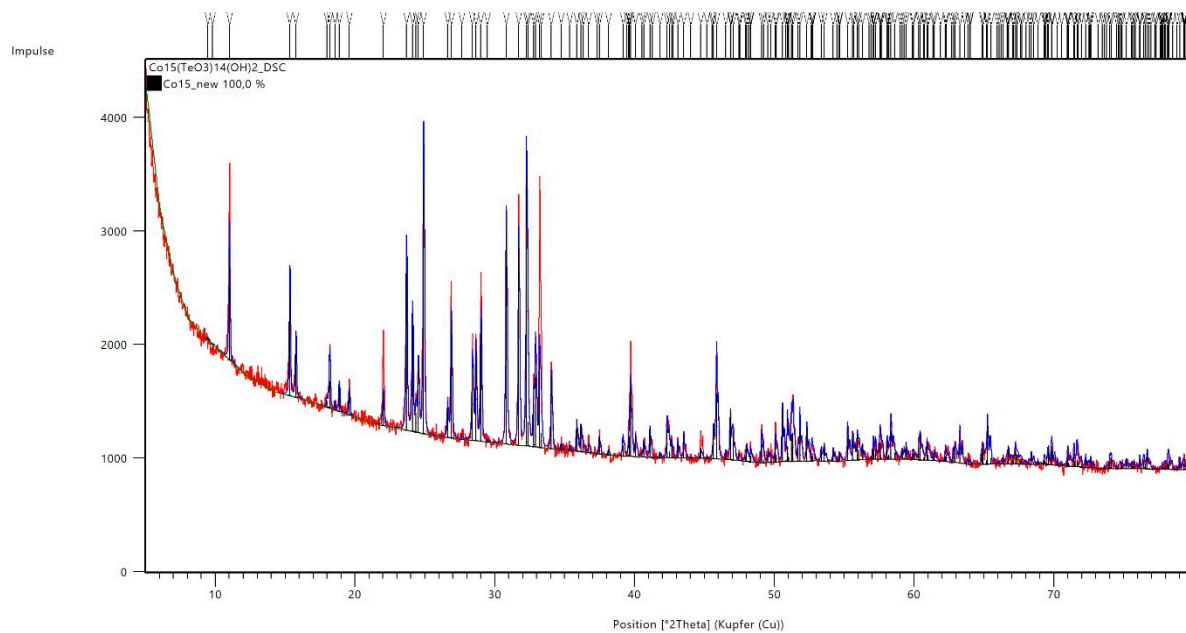

**Supplementary Figure S2.**  $\text{Co}_{15}(\text{TeO}_3)_{14}(\text{OH})_2$  after DSC heat treatment (maximum temperature 580 °C): measured PXRD data (blue) and simulated PXRD data (red). Refined unit-cell parameters on basis of the PXRD measurement are:  $a = 11.63946(15)$ ,  $c = 27.3534(5)$  Å.
